# Supplementary material for: Effect of sodium formate and lactic acid bacteria treated rye silage on methane yield and energy balance in Hanwoo steers
Source: PeerJ. 2024 Sep 5;12:e17920. doi: 10.7717/peerj.17920 (PMC11380838; doi:10.7717/peerj.17920)
Supplement: Supplemental Information 2 [file peerj-12-17920-s002.xlsx]

## Sheet: 0. Abbreviation
RS	experimental code name
CON	control
LAB	Lactic acid bacterial
FA	Sotium Formate
treatment	Control, LAB and FA treatment effect
period	Each experimental periods
animal	each animal
CH4gperd	methane g per day
gperkg	methane g per feed kg
perDDMI	methane g per digestible dry matter intake
perNDFI	methane g per neutrial detergent fiber dry matter intake
perDNDFI	methane g per digestibile neutrial detergent fiber dry matter intake
Ym	methane conversion factor
BW	body weight
Metabolic BW	BW^0.75
DM	Dry matter
CP	Crude protein
EE	Ether extract
CF	Crude fiber
NFE	Nitrogen Free Extract (NFE)
NDF	Neutral detergent fiber
ADF	Acid detergent fiber
cal	Kcal
GE	Gross energy
DE	Digestible energy
ME	Metabolic energy

## Sheet: 1. Rumen Fluid
treatment	period	animal	replication	ph	total VFA	acetic acid	propionic acid	iso-butyric acid	butyric acid	iso-valaric acid	valaric acid	Ammonia nitrogen
1	1	1	1	7.06667	78.1387	69.7886	18.497	0.912619	8.52712	1.20394	1.07081	16.8443
1	2	2	1	6.99	63.3882	69.5158	16.8569	1.11044	9.80677	1.52022	1.18983	10.3358
1	3	3	1	7.61333	41.9408	72.3193	15.9695	0.831082	8.50681	1.17602	1.19736	8.85931
1	1	4	2	7.03667	58.1392	67.1989	18.1962	1.16779	10.7702	1.21755	1.44944	5.56377
1	2	5	2	6.86333	74.9032	71.1131	16.199	0.991167	9.20963	1.05474	1.43235	4.95464
1	3	6	2	6.36667	86.1511	69.7471	16.0955	0.85387	10.7928	1.19529	1.31551	13.8785
2	1	2	1	6.92	45.5971	65.5408	19.5238	1.38994	10.2076	1.72174	1.61619	10.4348
2	2	3	1	6.69667	73.2472	68.288	18.0369	1.18223	9.67091	1.53631	1.28565	16.1404
2	3	1	1	6.77	56.4484	70.5479	18.4049	0.819689	7.91759	1.03164	1.27824	7.94642
2	1	5	2	7.32333	56.0884	69.0913	19.332	1.01037	8.36408	1.08756	1.11474	6.73813
2	2	6	2	6.73	54.6962	67.4598	19.5837	1.12395	8.38341	1.47271	1.97645	9.69985
2	3	4	2	7.23	65.8516	64.3314	22.9498	1.22418	8.14787	1.48357	1.86318	8.46591
3	1	3	1	6.96333	62.2389	70.8638	15.2527	1.08114	10.273	1.51809	1.01117	18.0674
3	2	1	1	7.17333	59.0101	66.7602	19.454	1.36094	9.30398	1.80477	1.31611	11.0612
3	3	2	1	6.79	75.1617	69.2467	18.595	1.12741	7.94836	1.68444	1.39811	16.1625
3	1	6	2	7.4	58.0608	67.0449	19.593	1.24842	9.18158	1.49577	1.43627	6.64277
3	2	4	2	6.94	55.9961	67.6614	19.4757	1.2233	7.95675	1.69046	1.99236	10.3426
3	3	5	2	7.07333	69.6673	69.595	18.0604	1.09449	8.46671	1.29544	1.48797	7.68564
RS-Control	trt 1
RS-LAB	trt 2
RS-FA	trt 3

## Sheet: 2. CH4 prodt.
treatment	period	animal	rep	CH4gperd	gperkg	perDDMI	perNDFI	perDNDFI	Ym
1	1	1	1	70.2082	16.0373	23.1046	29.1049	42.3982	8.14825
1	2	2	1	56.4848	12.9025	22.3939	23.4158	40.0675	6.92385
1	3	3	1	58.061	13.2626	20.3266	24.0693	37.4198	6.12202
1	1	4	2	75.2136	15.6833	20.22	28.0937	36.7664	6.94133
1	2	5	2	65.3611	13.6289	19.5396	24.4136	35.4797	5.58668
1	3	6	2	56.5271	11.7868	15.1916	21.114	26.9273	5.74489
2	1	2	1	89.0156	20.4691	26.0912	39.1898	50.4711	7.30313
2	2	3	1	74.2213	17.0672	24.058	32.6765	46.799	7.94943
2	3	1	1	56.9887	13.1046	19.6364	25.0897	40.235	5.78434
2	1	5	2	73.772	15.4882	19.4505	29.2888	36.7866	5.60203
2	2	6	2	53.6584	11.2654	14.8985	21.3033	28.9674	8.74703
2	3	4	2	67.7994	14.2342	19.8458	26.9175	38.4869	7.29247
3	1	3	1	54.1775	12.3968	19.5133	23.5175	38.6856	6.74568
3	2	1	1	67.9551	15.5494	21.8243	29.4981	43.152	6.23896
3	3	2	1	60.9722	13.9515	18.5353	26.4669	35.4907	6.41842
3	1	6	2	60.8338	12.7073	18.8913	23.8084	37.7798	6.54629
3	2	4	2	63.9476	13.3577	16.9984	25.0271	31.9718	5.87241
3	3	5	2	59.1334	12.3521	16.7339	23.1429	32.2476	5.87241
RS-Control	trt 1
RS-LAB	trt 2
RS-FA	trt 3

## Sheet: 3. Intakes and Energy balnace
	In vivo 실험 (CD종합)
	○ body weight, Feed intake, manure excretion
	CON	Initial BW	Final BW	Mean BW(kg)	Metabolic BW	Feed fed amt.(as fed base g/d)		total	DM feed amount(g/d)		total	Manure excretion amount(g/d)		Urine excretion(g/d)	Manure sample
		(kg)	(kg)			RS-control	Concentrate		RS-control	Concentrate		Raw	DM		Raw sample(g)	DM(g)
no. 1 (ch1)	1P control	253	291	272	66.9772	16000	1200	17200	3343.87	1033.93	4377.8	11275	1415.81	11060	4380	550
no. 2 (ch2)	2P control	260	309	284.5	69.2726	16000	1200	17200	3343.87	1033.93	4377.8	13890	1943.97	17007.5	2215	310
no. 3 (ch4)	3P control	242	295	268.5	66.3297	16000	1200	17200	3343.87	1033.93	4377.8	12810	1668.53	7485	1190	155
				275		5.81818			1.21595
				8.4113
no. 5 (ch1)	1P control	307	357	332	77.7774	18000	1200	19200	3761.86	1033.93	4795.79	9060	1558.09	17948.3	3925	675
no. 6 (ch2)	2P control	371	419	395	88.6029	18000	1200	19200	3761.86	1033.93	4795.79	12215	1930.76	22215	4650	735
no. 7 (ch4)	3P control	335	370	352.5	81.3522	18000	1200	19200	3761.86	1033.93	4795.79	9050	1770.13	5840	2270	444
				359.833		5.00232			1.04544
				32.1338
	Mean	294.667	340.167	317.417	75.052	17000	1200	17200	3343.87	1033.93	4377.8	12582.5	1679.89	14033.8	3297.5	430	1.3792	0.583333
						5.35574
	LAB	Initial BW	Final BW	Mean BW(kg)	Metabolic BW	Feed amount(g/d)		total	DM feed amount(g/d)		total	Manure excretion amount(g/d)		Urine excretion(g/d)	Manure sample
		(kg)	(kg)			RS-LAB	Concentrate		RS-LAB	Concentrate		Raw	DM		Raw sample(g)	DM(g)
no. 3 (ch4)	1P LAB	242	295	268.5	66.3297	16000	1200	17200	3314.84	1033.93	4348.77	7890	1481.46	32307.5	2370	445
no. 1 (ch1)	2P LAB	253	291	272	66.9772	16000	1200	17200	3314.84	1033.93	4348.77	10640	1814.1	10812.5	2610	445
no. 2 (ch2)	3P LAB	260	309	284.5	69.2726	16000	1200	17200	3314.84	1033.93	4348.77	12180	1676.5	20953.3	4795	660
no. 7 (ch4)	1P LAB	335	370	352.5	81.3522	18000	1200	19200	3729.2	1033.93	4763.13	8170	1585.22	8127.5	3350	650
no. 5 (ch1)	2P LAB	307	357	332	77.7774	18000	1200	19200	3729.2	1033.93	4763.13	9780	1777.02	11550	3825	695
no. 6 (ch2)	3P LAB	371	419	395	88.6029	18000	1200	19200	3729.2	1033.93	4763.13	11340	1761.25	23842.5	3670	570
	Mean	294.667	340.167	317.417	75.052	16500	1200	17700	3418.43	1033.93	4452.36	9720	1639.32	18050.2	3436.67	577.5
	FA	Initial BW	Final BW	Mean BW(kg)	Metabolic BW	Feed amount(g/d)		total	DM feed amount(g/d)		total	Manure excretion amount(g/d)		Urine excretion(g/d)	Manure sample
		(kg)	(kg)			RS-FA	Concentrate		RS-FA	Concentrate		Raw	DM		Raw sample(g)	DM(g)
no. 2 (ch2)	1P FA	260	309	284.5	69.2726	16000	1200	17200	3336.36	1033.93	4370.29	13420	1967.7	18277.5	4740	695
no. 3 (ch4)	2P FA	242	295	268.5	66.3297	16000	1200	17200	3336.36	1033.93	4370.29	10580	1667.65	22470	1935	305
no. 1 (ch1)	3P FA	253	291	272	66.9772	16000	1200	17200	3336.36	1033.93	4370.29	9100	1394.89	12490	2740	420
no. 6 (ch2)	1P FA	371	419	395	88.6029	18000	1200	19200	3753.4	1033.93	4787.33	13195	1998.83	25802.5	4885	740
no. 7 (ch4)	2P FA	335	370	352.5	81.3522	18000	1200	19200	3753.4	1033.93	4787.33	8633.3	1672.7	8041.67	1600	310
no. 5 (ch1)	3P FA	307	357	332	77.7774	18000	1200	19200	3753.4	1033.93	4787.33	10555	679.256	9637.5	9945	640
	Mean	294.667	340.167	317.417	75.052	16500	1200	17700	3440.62	1033.93	4474.55	11573.8	1757.27	19760	3575	540
	○ Feed chemial composition (DM)
	Sample		1st miosture	2nd miosture	CP	EE	CF	ash	NFE	NDF	ADF	cal	DM	C	N
	Contrate		11	3.19	16.16	4.84	3.96	6.71	68.33	27.37		4228
		%DM			16.6925	4.99948	4.09049	6.9311	67.2864	28.2719		4367.32
	RS-Control		77.6	6.7	9.67	4.18	32.08	6.88	47.19	59.15		4138
		%DM			10.3644	4.48017	34.3837	7.37406	43.3976	63.3976		4435.16
	RS-LAB		77.6	7.51	11.31	4.74	29.76	7.01	47.18	55.22		4170
		%DM			12.2283	5.12488	32.1765	7.5792	42.8911	59.7038		4508.6
	RS-FA		77.3	8.14	10.95	4.37	30.43	6.4	47.85	55.38		4224
		%DM			11.9203	4.75724	33.1265	6.96712	43.2288	60.2874		4598.3
	Feed residue	1st miosture	2nd miosture	CP	EE	CF	ash	NFE	NDF	ADF	cal
	RS-Control	65.42	7.11	9.93	3.88	26.09	7.56	52.54	50.47	0	4139
				10.6901	4.17698	28.087	8.13866	48.9073	54.3331	0	4455.81
	RS-LAB	70.49	6.32	7.73	2.96	32.1	6.77	50.44	59.25	0	4172
				8.25149	3.15969	34.2656	7.22673	47.0965	63.2472	0	4453.46
	RS-FA	69.1	7.76	10.55	7.18	30.04	7.11	45.12	55.52	0	4141
				11.4376	7.78404	32.5672	7.70815	40.503	60.1908	0	4489.38
	○ manure and urine chemical compostion(Manure DM, %)
	sample	Manure chemical composition												뇨 성 분
		1st miosture	2nd miosture	CP	EE	CF	ash	NFE	NDF	ADF	cal	C	N	C	N	cal
no. 1 (ch1)	1P(Control)	87.4429	5.41874	11.11	2.74	25.72	11.63	48.8	53.42		4252				0.49	216
	%DM			11.7465	2.89698	27.1935	12.2963	51.5958	56.4805		4495.61
no. 2 (ch2)	2P(Control)	86.0045	4.5522	11.21	1.83	24.07	4.55	58.34	51.57		4254				0.27	137
	%DM			11.7446	1.91728	25.218	4.767	61.1224	54.0295		4497.72
no. 3 (ch4)	3P(Control)	86.9748	4.11665	11.23	5.31	25.7	13.09	44.67	54.24		4155				0.46	201
	%DM			11.7121	5.53798	26.8034	13.652	46.5879	56.5687		4333.39
no. 5 (ch1)	1P(Control)	82.8025	4.46466	10.03	2.47	26.74	11.91	48.85	56.07		4245				0.42	173
	%DM			10.4987	2.58543	27.9896	12.4666	51.1329	58.6903		4443.38
no. 6 (ch2)	2P(Control)	84.1935	6.40944	10.13	2.21	26.22	11.2	50.24	53.87		4200				0.26	136
	%DM			10.8237	2.36135	28.0156	11.967	53.6806	57.5592		4487.63
no. 7 (ch4)	3P(Control)	80.4405	3.96985	11.83	3.31	23.97	12.43	48.46	51.64		4235				0.85	227
	%DM			12.319	3.44683	24.9609	12.9439	50.4633	53.7748		4410.07
	Mean		4.82192	11.4741	3.12431	26.6969	11.3488	52.4305	56.1839		4444.63	0	0	0	0.458333	181.667
no. 3 (ch4)	1P(LAB)	81.2236	4.16	11.44	3.24	24.98	12.31	48.03	54.18		4357				0.14	139
	%DM			11.9366	3.38063	26.0643	12.8443	50.1148	56.5317		4418.82
no. 1 (ch1)	2P(LAB)	82.9502	5.46	11.86	2.74	23.7	11.69	50.01	51.28		4243				0.52	195
	%DM			12.545	2.89824	25.0688	12.3651	52.8982	54.2416		4701.33
no. 2 (ch2)	3P(LAB)	86.2357	7.03	11.43	2.18	25.95	10.46	49.98	54.95		4178				0.28	145
	%DM			12.2943	2.34484	27.9122	11.2509	53.7593	59.1051		4493.92
no. 7 (ch4)	1P(LAB)	80.597	7.84	11.13	2.62	23.23	12.03	50.99	48.76		4147				0.52	222
	%DM			12.0768	2.84288	25.2062	13.0534	55.3277	52.908		4499.78
no. 5 (ch1)	2P(LAB)	81.8301	5.74	10.99	2.89	20.97	11.17	53.98	54.08		4257				0.48	187
	%DM			11.6592	3.06599	22.247	11.8502	57.2671	57.3732		4516.23
no. 6 (ch2)	3P(LAB)	84.1935	6.17	11.57	2.59	25.95	11	48.89	52.75		4201				0.24	131
	%DM			12.3308	2.76031	27.6564	11.7233	52.1049	56.2187		4477.25
	Mean		6.06667	12.1404	2.88215	25.6925	12.1812	53.5787	56.4795		4517.89	0	0	0	0.458333	181.667
no. 2 (ch2)	1P(FA)	85.3376	4.82	10.99	3.1	25.13	11.31	49.47	53.94		4271				0.33	168
	%DM			11.5465	3.25699	26.4026	11.8827	51.9752	56.6716		4487.29
no. 3 (ch4)	2P(FA)	84.2377	4	9.88	2.53	26.25	11.07	50.27	55.69		4340				0.23	145
	%DM			10.2917	2.63542	27.3438	11.5312	52.3646	58.0104		4520.83
no. 1 (ch1)	3P(FA)	84.6715	4.55	12.04	2.61	25.13	10.96	49.26	51.73		4298				0.42	165
	%DM			12.6139	2.73442	26.3279	11.4825	51.6082	54.1959		4502.88
no. 6 (ch2)	1P(FA)	84.8516	6.13	9.66	2.21	27.2	11.14	49.79	56.6		4230				0.15	121
	%DM			10.2908	2.35432	28.9762	11.8675	53.0414	60.2962		4506.23
no. 7 (ch4)	2P(FA)	80.625	4.71	12.04	3.94	24.1	10.57	49.35	51.58		4463				0.76	219
	%DM			12.6351	4.13475	25.2912	11.0925	51.7893	54.1295		4683.6
no. 5 (ch1)	3P(FA)	93.5646	6.53	11.23	3.23	26.99	9.98	48.57	53.79		4288				0.64	210
	%DM			12.0146	3.45565	28.8756	10.6772	51.9632	57.5479		4587.57
	Mean		5.12333	11.5654	3.09526	27.2029	11.4223	52.1236	56.3233		4548.07	0	0	0	0.458333	181.667
	○Nurient intake(DM, g)
	sample	DM		CP	EE	CF	Ash	NFE	NDF	ADF	kcal	C	N
no. 1 (ch1)	1P control	4377.8		519.162	223.061	1192.04	318.242	2146.86	2412.25		19346.1
no. 2 (ch2)	2P control	4377.8		519.162	223.061	1192.04	318.242	2146.86	2412.25		19346.1
no. 3 (ch4)	3P control	4377.8		519.162	223.061	1192.04	318.242	2146.86	2412.25		19346.1
no. 5 (ch1)	1P control	4795.79		562.483	244.482	1335.76	349.064	2328.25	2677.24		21199.9
no. 6 (ch2)	2P control	4795.79		562.483	244.482	1335.76	349.064	2328.25	2677.24		21199.9			1300.88	1.30088	4377.8	4.3778	2328.25	2.32825	1419.05	1.41905
no. 7 (ch4)	3P control	4795.79		562.483	244.482	1335.76	349.064	2328.25	2677.24		21199.9			1358.91	1.35891	4348.77	4.34877	1410.79	1.41079	1492.23	1.49223
	Mean	4586.79	#DIV/0!	540.822	233.771	1263.9	333.653	2237.55	2544.74		19809.6			1397.53	1.39753	4370.29	4.37029	1507.35	1.50735	1535.68	1.53568
no. 3 (ch4)	1P LAB	4348.77		516.153	218.713	1108.89	322.901	2117.47	2271.4		19460.8
no. 1 (ch1)	2P LAB	4348.77		516.153	218.713	1108.89	322.901	2117.47	2271.4		19460.8
no. 2 (ch2)	3P LAB	4348.77		516.153	218.713	1108.89	322.901	2117.47	2271.4		19460.8
no. 7 (ch4)	1P LAB	4763.13		559.098	239.428	1242.22	354.306	2295.19	2518.78		21328.9
no. 5 (ch1)	2P LAB	4763.13		559.098	239.428	1242.22	354.306	2295.19	2518.78		21328.9
no. 6 (ch2)	3P LAB	4763.13		559.098	239.428	1242.22	354.306	2295.19	2518.78		21328.9
	Mean	4555.95	#DIV/0!	537.626	229.07	1175.55	338.604	2206.33	2395.09		19927.8
no. 2 (ch2)	1P FA	4370.29		518.383	210.41	1147.51	304.111	2137.96	2303.71		19857.1
no. 3 (ch4)	2P FA	4370.29		518.383	210.41	1147.51	304.111	2137.96	2303.71		19857.1
no. 1 (ch1)	3P FA	4370.29		518.383	210.41	1147.51	304.111	2137.96	2303.71		19857.1
no. 6 (ch2)	1P FA	4787.33		561.607	230.249	1285.66	333.167	2318.25	2555.14		21774.8
no. 7 (ch4)	2P FA	4787.33		561.607	230.249	1285.66	333.167	2318.25	2555.14		21774.8
no. 5 (ch1)	3P FA	4787.33		561.607	210.41	1285.66	333.167	2318.25	2555.14		21774.8
	Mean	4578.81	#DIV/0!	539.995	217.023	1216.59	318.639	2228.1	2429.43		20336.5
												0
	○ Manure and urine nutrient excretion amount(DM, g)
	sample	Manure											Urine
		DM			CP	EE	CF	Ash	NFE	NDF	ADF	Kcal				N(g/d)	kcal
no. 1 (ch1)	1P control	1339.09			157.297	38.7932	364.146	164.659	690.916	756.326		6020.03				54.194	2388.96
no. 2 (ch2)	2P control	1855.48			217.919	35.5747	467.914	88.4508	1134.11	1002.51		8345.43				45.9203	2330.03
no. 3 (ch4)	3P control	1521.4			178.188	84.2547	407.786	207.701	708.787	860.635		6592.81				34.431	1504.49
no. 5 (ch1)	1P control	1076.02			112.969	27.8198	301.175	134.143	550.202	631.522		4781.18				75.383	3105.06
no. 6 (ch2)	2P control	1450.73			157.023	34.2568	406.432	173.609	778.762	835.03		6510.35				57.759	3021.24
no. 7 (ch4)	3P control	1074.84			132.41	37.0478	268.289	139.125	542.398	577.991		4740.11				49.64	1325.68
	Mean	1386.26			159.301	42.9579	369.291	151.281	734.196	777.335	#DIV/0!	6164.98
no. 3 (ch4)	1P LAB	937.067			107.2	30.361	234.079	115.353	450.073	507.703		4082.8				45.2305	4490.74
no. 1 (ch1)	2P LAB	1263.67			158.527	36.6244	316.788	156.255	668.462	685.437		5940.95				56.225	2108.44
no. 2 (ch2)	3P LAB	1446.57			177.846	33.9199	403.771	162.753	777.668	854.999		6500.8				58.6693	3038.23
no. 7 (ch4)	1P LAB	970.322			117.184	27.5851	244.581	126.66	536.857	513.378		4366.24				42.263	1804.31
no. 5 (ch1)	2P LAB	1161.54			135.426	35.6125	258.407	137.644	665.178	666.41		5245.76				55.44	2159.85
no. 6 (ch2)	3P LAB	1346.81			166.073	37.1762	372.479	157.891	701.754	757.16		6030.01				57.222	3123.37
	Mean	1187.66			143.709	33.5465	305.018	142.759	633.332	664.181	#DIV/0!	5361.09
no. 2 (ch2)	1P FA	1593.85			184.034	51.9113	420.817	189.393	828.404	903.257		7152.04				60.3158	3070.62
no. 3 (ch4)	2P FA	1256.55			129.32	33.1153	343.588	144.896	657.986	728.929		5680.65				51.681	3258.15
no. 1 (ch1)	3P FA	1080.77			136.328	29.5529	284.545	124.099	557.768	585.736		4866.6				52.458	2060.85
no. 6 (ch2)	1P FA	1567.12			161.27	36.8951	454.093	185.978	831.225	944.915		7061.82				38.7037	3122.1
no. 7 (ch4)	2P FA	1025.35			129.554	42.3955	259.323	113.736	531.019	555.015		4802.31				61.1167	1761.13
no. 5 (ch1)	3P FA	1253.58			150.612	43.3194	361.978	133.847	651.4	721.408		5750.88				61.68	2023.88
	Mean	1296.2			148.52	39.5316	354.057	148.658	676.3	739.877	#DIV/0!	5885.72
	○ Digestibility(%)
	sample	DM	OM		CP	EE	CF	Ash	NFE	NDF	ADF	GE	C	N	CH4(g/d)	per DMI (kg)	per DDMI	per NDFI	per DNDFI	Ym
no. 1 (ch1)	1P control	69.4118			69.7018	82.6087	69.4518	48.2599	67.8173	68.6464		68.8825			70.2082	16.0373	23.1046	29.1049	42.3982	8.14825
no. 2 (ch2)	2P control	57.6162			58.0248	84.0515	60.7468	72.2064	47.1733	58.441		56.8625			56.4848	12.9025	22.3939	23.4158	40.0675	6.92385
no. 3 (ch4)	3P control	65.2475			65.6777	62.2279	65.7909	34.7348	66.9849	64.3223		65.9218			58.061	13.2626	20.3266	24.0693	37.4198	6.12202
no. 5 (ch1)	1P control	77.5631			79.916	88.6209	77.4529	61.5706	76.3684	76.4115		77.4472			75.2136	15.6833	20.22	28.0937	36.7664	6.94133
no. 6 (ch2)	2P control	69.7499			72.0839	85.988	69.5729	50.2644	66.5516	68.81		69.2907			65.3611	13.6289	19.5396	24.4136	35.4797	5.58668
no. 7 (ch4)	3P control	77.5879			76.4598	84.8464	79.9149	60.1434	76.7036	78.4109		77.6409			56.5271	11.7868	15.1916	21.114	26.9273	5.74489
	Mean	67.4596			70.3107	81.3906	70.4884	54.5299	66.9332	69.1737	#DIV/0!	69.3409
no. 3 (ch4)	1P LAB	78.4521			79.2309	84.4397	73.3878	64.2761	79.0357	77.648		79.0204			89.0156	20.4691	26.0912	39.1898	50.4711	7.30313
no. 1 (ch1)	2P LAB	70.9418			69.2867	81.6318	66.4494	51.609	68.8632	69.8231		69.4722			74.2213	17.0672	24.058	32.6765	46.799	7.94943
no. 2 (ch2)	3P LAB	66.736			65.5439	82.8442	59.1524	49.5966	63.7764	62.358		66.5954			56.9887	13.1046	19.6364	25.0897	40.235	5.78434
no. 7 (ch4)	1P LAB	79.6285			79.0405	86.6499	74.6868	64.2513	76.9416	79.618		79.5291			73.772	15.4882	19.4505	29.2888	36.7866	5.60203
no. 5 (ch1)	2P LAB	75.614			75.7777	83.3664	73.6518	61.151	71.4301	73.5424		75.4054			53.6584	11.2654	14.8985	21.3033	28.9674	8.74703
no. 6 (ch2)	3P LAB	71.7242			70.2963	82.7269	65.1118	55.4365	69.8592	69.9395		71.7285			67.7994	14.2342	19.8458	26.9175	38.4869	7.29247
	Mean	73.9396			73.196	83.6098	68.74	57.7201	71.6511	72.1548	#DIV/0!	73.6252
no. 2 (ch2)	1P FA	63.53			64.4984	75.3284	63.3279	37.7225	61.2526	60.7912		63.9824			54.1775	12.3968	19.5133	23.5175	38.6856	6.74568
no. 3 (ch4)	2P FA	71.2479			75.0532	84.2615	70.058	52.3543	69.2237	68.3585		71.3923			67.9551	15.5494	21.8243	29.4981	43.152	6.23896
no. 1 (ch1)	3P FA	75.2699			73.7012	85.9546	75.2032	59.1927	73.9112	74.5743		75.4919			60.9722	13.9515	18.5353	26.4669	35.4907	6.41842
no. 6 (ch2)	1P FA	67.2652			71.2842	83.976	64.6802	44.1787	64.1442	63.019		67.5688			60.8338	12.7073	18.8913	23.8084	37.7798	6.54629
no. 7 (ch4)	2P FA	78.5821			76.9316	81.5872	79.8297	65.8621	77.0939	78.2785		77.9455			63.9476	13.3577	16.9984	25.0271	31.9718	5.87241
no. 5 (ch1)	3P FA	73.8146			73.182	79.4119	71.845	59.8257	71.9012	71.7664		73.5892			59.1334	12.3521	16.7339	23.1429	32.2476	5.87241
	Mean	69.3283			72.4418	81.7533	70.824	53.1893	69.5878	69.4647	#DIV/0!	71.6617
	○Nutrient intake(per metabolic BW)								○N balance (per metabolic BW)
	sample	DM(g)	N	Manure	Urine	Total	N balance		N	Manure	Urine	Total	N balance
no. 1 (ch1)	1P(Control)	65.3626	1.24021	0.375762	0.809142	1.1849	0.0553085		83.0659	25.1674	54.194	79.3614	3.70441
no. 2 (ch2)	2P(Control)	63.1967	1.19912	0.503331	0.662892	1.16622	0.0328919		82.9332	34.8671	45.9203	80.7873	2.14581
no. 3 (ch4)	3P(Control)	66.0006	1.25232	0.429824	0.519089	0.948913	0.303404		83.0659	28.5101	34.431	62.9411	20.1247
no. 5 (ch1)	1P(Control)	61.6604	1.15711	0.232394	0.969214	1.20161	-0.0444948		89.9973	18.075	75.383	93.458	-3.46069
no. 6 (ch2)	2P(Control)	54.1268	1.01574	0.283555	0.651886	0.935441	0.0802971		89.9973	25.1238	57.759	82.8828	7.11456
no. 7 (ch4)	3P(Control)	58.9509	1.10627	0.260417	0.610186	0.870604	0.235664		89.9973	21.1855	49.64	70.8255	19.1718
	Mean		1.16179	0.347547	0.703735	1.05128	0.110512		86.5095	25.4882	52.8879	78.376	8.13343
no. 3 (ch4)	1P(LAB)	65.5629	1.24506	0.258588	0.681904	0.940492	0.304567		82.5844	17.1521	45.2305	62.3826	20.2019
no. 1 (ch1)	2P(LAB)	64.9292	1.23302	0.378702	0.839465	1.21817	0.0148567		82.5844	25.3644	56.225	81.5894	0.995056
no. 2 (ch2)	3P(LAB)	62.7776	1.19217	0.410774	0.846934	1.25771	-0.0655419		82.5844	28.4554	58.6693	87.1247	-4.54026
no. 7 (ch4)	1P(LAB)	58.5495	1.09961	0.230472	0.519506	0.749979	0.349631		89.4557	18.7494	42.263	61.0124	28.4433
no. 5 (ch1)	2P(LAB)	61.2405	1.15015	0.278592	0.712803	0.991396	0.158755		89.4557	21.6682	55.44	77.1082	12.3475
no. 6 (ch2)	3P(LAB)	53.7582	1.00963	0.299896	0.645826	0.945721	0.0639041		89.4557	26.5716	57.222	83.7936	5.66208
	Mean		0.347547	0.309504	0.70774	1.01724	0.137695		86.0201	22.9935	52.5083	75.5018	10.5183
no. 2 (ch2)	1P(FA)	63.0882	1.19732	0.425066	0.870701	1.29577	-0.0984515		82.9412	29.4454	60.3158	89.7612	-6.81999
no. 3 (ch4)	2P(FA)	65.8873	1.25044	0.311944	0.779153	1.0911	0.159341		82.9412	20.6912	51.681	72.3722	10.569
no. 1 (ch1)	3P(FA)	65.2504	1.23835	0.325671	0.783222	1.10889	0.129458		82.9412	21.8125	52.458	74.2705	8.6707
no. 6 (ch2)	1P(FA)	54.0313	1.01416	0.291223	0.436823	0.728046	0.28611		89.8571	25.8032	38.7037	64.5069	25.3501
no. 7 (ch4)	2P(FA)	58.847	1.10454	0.254801	0.75126	1.00606	0.0984832		89.8571	20.7286	61.1167	81.8453	8.01183
no. 5 (ch1)	3P(FA)	61.5517	1.15531	0.309832	0.793032	1.10286	0.0524467		89.8571	24.0979	61.68	85.7779	4.07917
	Mean		1.16002	0.319756	0.735699	1.05545	0.104564		86.3991	23.7631	54.3259	78.089	8.31015
	○ energy cumulation ratio (kcal)
	Treatment	Energyt intake	Energy in manure	DE(%)	Energy in urine	methane	ME(%)	HP	RE		Energy	Intake	feces	urine	methane	heat	balance
no. 1 (ch1)	1P control	19346.1	6020.03	68.8825	2388.96	1576.37	48.3857	4207.7	5153.04		1P control	100	31.1175	12.3485	8.14825	21.7496	26.6361
no. 2 (ch2)	2P control	19346.1	8345.43	56.8625	2330.03	1339.49	37.8947	3369.43	3961.71		2P control	100	43.1375	12.0439	6.92385	17.4166	20.4781
no. 3 (ch4)	3P control	19346.1	6592.81	65.9218	1504.49	1184.37	52.023	3795.16	6269.26		3P control	100	34.0782	7.77669	6.12202	19.6172	32.4058
no. 5 (ch1)	1P control	21199.9	4781.18	77.4472	3105.06	1471.56	55.8593	3575	8267.12		1P control	100	22.5528	14.6466	6.94133	16.8633	38.996
no. 6 (ch2)	2P control	21199.9	6510.35	69.2907	3021.24	1184.37	49.4528	3300.4	7183.55		2P control	100	30.7093	14.2512	5.58668	15.568	33.8848
no. 7 (ch4)	3P control	21199.9	4740.11	77.6409	1325.68	1217.91	65.6428	5069.81	8846.41		3P control	100	22.3591	6.25323	5.74489	23.9143	41.7285
	Mean	20273	6164.98		2279.24	1329.01		3886.25	6613.52		Mean	100	30.6591	11.22	6.57784	19.1882	32.3549
no. 3 (ch4)	1P LAB	19460.8	4082.8	79.0204	4490.74	1421.25	48.6414	3639.62	5826.37		1P LAB	100	20.9796	23.0759	7.30313	18.7023	29.939
no. 1 (ch1)	2P LAB	19460.8	5940.95	69.4722	2108.44	1547.02	50.6885	4641.8	5222.58		2P LAB	100	30.5278	10.8343	7.94943	23.8521	26.8364
no. 2 (ch2)	3P LAB	19460.8	6500.8	66.5954	3038.23	1125.68	45.199	3620.4	5175.67		3P LAB	100	33.4046	15.6121	5.78434	18.6036	26.5954
no. 7 (ch4)	1P LAB	21328.9	4366.24	79.5291	1804.31	1194.85	65.4676	3630.16	10333.4		1P LAB	100	20.4709	8.45942	5.60203	17.0199	48.4477
no. 5 (ch1)	2P LAB	21328.9	5245.76	75.4054	2159.85	1865.65	56.532	6119.22	5938.46		2P LAB	100	24.5946	10.1264	8.74703	28.6898	27.8423
no. 6 (ch2)	3P LAB	21328.9	6030.01	71.7285	3123.37	1555.41	49.7923	5402.67	5217.49		3P LAB	100	28.2715	14.6438	7.29247	25.3302	24.462
	Mean	20394.9	5361.09		2787.49	1451.64		4508.98	6285.66		Mean	100	26.3457	14.4954	6.65973	19.5445	32.9546
no. 2 (ch2)	1P FA	19857.1	7152.04	63.9824	3070.62	1339.49	41.7731	4448.45	3846.47		1P FA	100	36.0176	15.4636	6.74568	22.4023	19.3708
no. 3 (ch4)	2P FA	19857.1	5680.65	71.3923	3258.15	1238.87	48.7454	2777	6902.4		2P FA	100	28.6077	16.408	6.23896	13.9849	34.7604
no. 1 (ch1)	3P FA	19857.1	4866.6	75.4919	2060.85	1274.51	58.695	4459.69	7195.43		3P FA	100	24.5081	10.3784	6.41842	22.4589	36.2361
no. 6 (ch2)	1P FA	21774.8	7061.82	67.5688	3122.1	1425.44	46.6843	2832.75	7332.65		1P FA	100	32.4312	14.3382	6.54629	13.0093	33.675
no. 7 (ch4)	2P FA	21774.8	4802.31	77.9455	1761.13	1278.7	63.9852	4449.5	9483.13		2P FA	100	22.0545	8.08792	5.87241	20.4342	43.551
no. 5 (ch1)	3P FA	21774.8	5750.88	73.5892	2023.88	1136.16	59.0769	4176	8687.85		3P FA	100	26.4108	9.29459	5.21778	19.1781	39.8987
	Mean	20815.9	5885.72		2549.45	1282.2		3857.23	7241.32		Mean	100	30.3912	14.1471	6.48734	17.9639	31.0106
	○ energy cumulation ratio(kcal/BW^0.75)
	Treatment	Energyt intake	Energy in manure	DE(%)	DE/GE	Energy in urine	Methane	ME	HP	RE
no. 1 (ch1)	1P control	288.846	89.8818	198.964	1.45175	35.6683	23.5359	139.76	62.823	76.9373
no. 2 (ch2)	2P control	279.275	120.472	158.803	1.75863	33.6356	19.3365	105.83	48.6402	57.1902
no. 3 (ch4)	3P control	291.666	99.3945	192.271	1.51695	22.6819	17.8558	151.733	57.2166	94.5167
no. 5 (ch1)	1P control	272.572	61.4726	211.099	1.2912	39.9224	18.9201	152.256	45.9645	106.292
no. 6 (ch2)	2P control	239.269	73.4779	165.791	1.4432	34.0987	13.3672	118.325	37.2494	81.0758
no. 7 (ch4)	3P control	260.594	58.2665	202.328	1.28798	16.2956	14.9709	171.061	62.3193	108.742
	Mean	272.037	83.8276	188.209	1.45828	30.3837	17.9977	139.828	52.3688	87.459
no. 3 (ch4)	1P LAB	293.395	61.5531	231.841	1.2655	67.7033	21.427	142.711	54.8716	87.8395
no. 1 (ch1)	2P LAB	290.559	88.7011	201.857	1.43942	31.48	23.0977	147.28	69.3042	77.9756
no. 2 (ch2)	3P LAB	280.93	93.8436	187.087	1.50161	43.8591	16.25	126.978	52.2631	74.7146
no. 7 (ch4)	1P LAB	262.18	53.6708	208.509	1.2574	22.1789	14.6874	171.643	44.6228	127.02
no. 5 (ch1)	2P LAB	274.231	67.4458	206.785	1.32616	27.7696	23.987	155.028	78.6761	76.352
no. 6 (ch2)	3P LAB	240.725	68.0565	172.669	1.39415	35.2513	17.5548	119.863	60.9763	58.8863
	Mean	273.67	72.2118	201.458	1.36404	38.0404	19.5007	143.917	60.119	83.798
no. 2 (ch2)	1P FA	286.651	103.245	183.406	1.56293	44.3266	19.3365	119.743	64.2165	55.5265
no. 3 (ch4)	2P FA	299.369	85.6426	213.727	1.40071	49.1205	18.6775	145.929	41.8665	104.062
no. 1 (ch1)	3P FA	296.475	72.6606	223.815	1.32465	30.7694	19.029	174.016	66.5852	107.431
no. 6 (ch2)	1P FA	245.757	79.7019	166.055	1.47997	35.237	16.088	114.73	31.9714	82.7586
no. 7 (ch4)	2P FA	267.66	59.0311	208.629	1.28295	21.6482	15.7181	171.263	54.6943	116.569
no. 5 (ch1)	3P FA	279.963	73.9402	206.022	1.35889	26.0214	14.6078	165.393	53.6916	111.701
	Mean	279.313	79.0369	200.276	1.40168	34.5205	17.2428	148.512	52.1709	96.3414
	Energy	Intake	feces	%	urine	%	methane		heat		balance	%
no. 1 (ch1)	1P control	19346.1	6020.03	31.1175	2388.96	12.3485	1576.37	8.14825	4207.7	21.7496	5153.04	26.6361
no. 2 (ch2)	2P control	19346.1	8345.43	43.1375	2330.03	12.0439	1339.49	6.92385	3369.43	17.4166	3961.71	20.4781
no. 3 (ch4)	3P control	19346.1	6592.81	34.0782	1504.49	7.77669	1184.37	6.12202	3795.16	19.6172	6269.26	32.4058
no. 5 (ch1)	1P control	21199.9	4781.18	22.5528	3105.06	14.6466	1471.56	6.94133	3575	16.8633	8267.12	38.996
no. 6 (ch2)	2P control	21199.9	6510.35	30.7093	3021.24	14.2512	1184.37	5.58668	3300.4	15.568	7183.55	33.8848
no. 7 (ch4)	3P control	21199.9	4740.11	22.3591	1325.68	6.25323	1217.91	5.74489	5069.81	23.9143	8846.41	41.7285
	Mean	20273	5687		2304.77	11.3687	1329.01		3685.08		7268.19	35.7009
no. 3 (ch4)	1P LAB	19460.8	4082.8	20.9796	4490.74	23.0759	1421.25	7.30313	3639.62	18.7023	5826.37	29.939
no. 1 (ch1)	2P LAB	19460.8	5940.95	30.5278	2108.44	10.8343	1547.02	7.94943	4641.8	23.8521	5222.58	26.8364
no. 2 (ch2)	3P LAB	19460.8	6500.8	33.4046	3038.23	15.6121	1125.68	5.78434	3620.4	18.6036	5175.67	26.5954
no. 7 (ch4)	1P LAB	21328.9	4366.24	20.4709	1804.31	8.45942	1194.85	5.60203	3630.16	17.0199	10333.4	48.4477
no. 5 (ch1)	2P LAB	21328.9	5245.76	24.5946	2159.85	10.1264	1865.65	8.74703	6119.22	28.6898	5938.46	27.8423
no. 6 (ch2)	3P LAB	21328.9	6030.01	28.2715	3123.37	14.6438	1555.41	7.29247	5402.67	25.3302	5217.49	24.462
	Mean	20394.9	5433.52		2421.27	11.872	1451.64		3625.28		7754.53	37.5216
no. 2 (ch2)	1P FA	19857.1	7152.04	36.0176	3070.62	15.4636	1339.49	6.74568	4448.45	22.4023	3846.47	19.3708
no. 3 (ch4)	2P FA	19857.1	5680.65	28.6077	3258.15	16.408	1238.87	6.23896	2777	13.9849	6902.4	34.7604
no. 1 (ch1)	3P FA	19857.1	4866.6	24.5081	2060.85	10.3784	1274.51	6.41842	4459.69	22.4589	7195.43	36.2361
no. 6 (ch2)	1P FA	21774.8	7061.82	32.4312	3122.1	14.3382	1425.44	6.54629	2832.75	13.0093	7332.65	33.675
no. 7 (ch4)	2P FA	21774.8	4802.31	22.0545	1761.13	8.08792	1278.7	5.87241	4449.5	20.4342	9483.13	43.551
no. 5 (ch1)	3P FA	21774.8	5750.88	26.4108	2023.88	9.29459	1136.16	5.21778	4176	19.1781	8687.85	39.8987
	Mean	20815.9	5964.21		2591.48	12.4495	1282.2		3646.22		7264.04	34.9555
